# Supplementary material for: Knocking DownSnrnp200Initiates Demorphogenesis of Rod Photoreceptors in Zebrafish
Source: Hindawi journal article supplement (doi:10.1155/2015/816329), 2015-01-01
Supplement: f1 [file 816329.f1.pdf]

## SI Figure, Legends and Tables

### Legends to Supplementary Figure S1

**FIGURE S1:** A. Regular (upper panel) and aberrant spliced product (lower panel) generated by zebrafish injected with control morpholinos (MO) or *snrnp200* MO, respectively. B. Morphological changes in zebrafish injected with control morpholinos (MO; dosage: 4 ng) or *snrnp200* MO (dosages: 2, 4, and 8 ng, respectively) at 4 days post fertilization (dpf). C. Quantification of normal, deformed and dead zebrafish injected with control morpholinos (MO; dosage: 4 ng) or *snrnp200* MO (dosages: 2, 4, and 8 ng, respectively) from 2 to 4 days post fertilization (dpf). Data in C are presented as mean  $\pm$  standard deviation (SD) from technical triplicates. \*  $P < 0.05$ .

Supplementary Figure S1

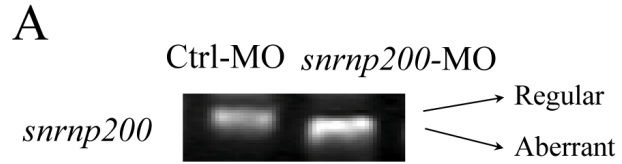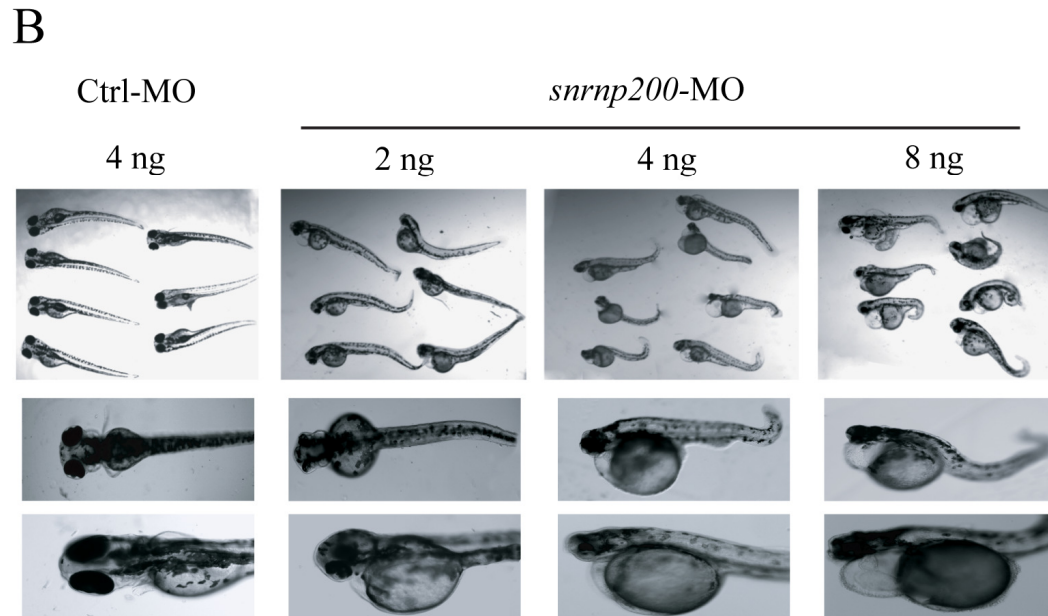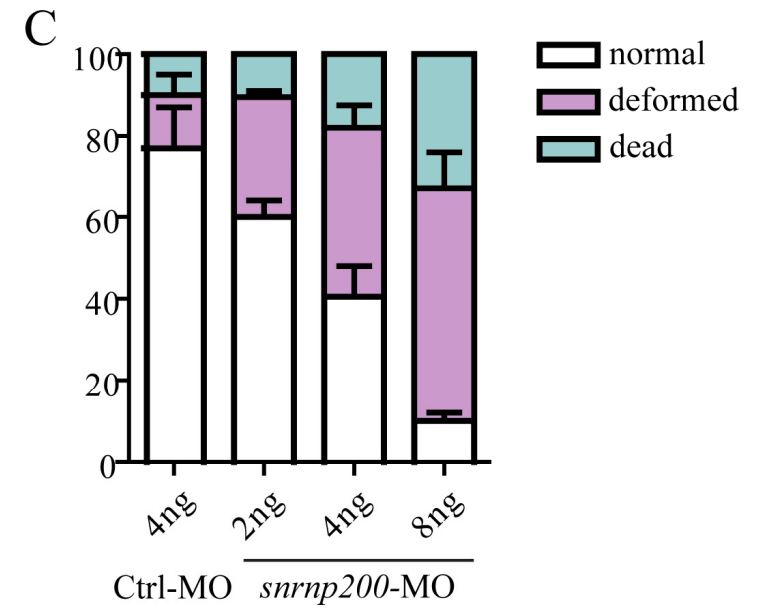

Supplementary TABLE S1: Summary of Primer Information.

| Gene / Plasmid                                                           | Forward Primer (5'→3') | Reverse Primer (5'→3')    |
|--------------------------------------------------------------------------|------------------------|---------------------------|
| <b><i>For In Situ Probe Synthesis</i></b>                                |                        |                           |
| <i>snrnp200</i>                                                          | ACCGGGTGTGCTGGTTAATA   | CGATGGCATCGTTGTAGAAG      |
| <b><i>For Verification of the Effectiveness of Morpholino Oligos</i></b> |                        |                           |
| <i>snrnp200</i> -MO                                                      | AGCGAACTCTAACTTGGT     | TTCTCATCAGTCTCCATAGTGGTTT |
| <b><i>For Verification of the Splicing Defects Caused</i></b>            |                        |                           |
| <i>cbln1-E1/E2</i>                                                       | TCAAATCCCACCTCAGACCC   | CTTCTACCAACGTTGACCAGT     |
| <b><i>For Q-PCR Assay</i></b>                                            |                        |                           |
| <i>β-actin</i>                                                           | CGAGCTGTCTTCCCATCCA    | TCACCAACGTAGCTGTCTTTCTG   |
| <i>prpf3</i>                                                             | GCTAAGTTTTGCGGCTCCTA   | TCCAGGGTTTCCCACAGTAG      |
| <i>prpf31</i>                                                            | CAAGCAGGTCAAGCCTCTTC   | TTGTCTGACTCTGCCACTGC      |
| <i>prpf6</i>                                                             | GAGAAAGTTGGGCAGCTCAC   | GACATTCCTGAAGGGCTTTG      |
| <i>prpf8</i>                                                             | TTCCATGGGACACGTACTGA   | CTGTGCTTGAGGGCATATT       |

|                |                       |                       |
|----------------|-----------------------|-----------------------|
| <i>eftud2</i>  | CTACACGGGTGGACTGGACT  | TTTCTCCCAGAACCTTCACG  |
| <i>sart1</i>   | AGAAGGTGGCTCGTGTCAAG  | CCCCGATTCATCAACGTATT  |
| <i>opn1lw1</i> | AAACCACAAGGGAAGCAATG  | GGATCCAGTTGAGAGGGTGA  |
| <i>gnat2</i>   | AGTCTGCTCTGGCCATCATC  | AGCAGAGTCGTTTCAGCTGGT |
| <i>rs1</i>     | CCTGAAGGAGGTGAAAGTGG  | TGGAAGAGCGGTCAGAGTTC  |
| <i>opn1sw1</i> | TTCCTTCTCGTCACCTGCTT  | AATCCTTGTTTGGCTCATCG  |
| <i>snrpg</i>   | GAACAACGCTTGAAACGTGA  | CATGAAGGGGTCAAATCCAC  |
| <i>rds4</i>    | ACCACCTGACCAACAACCTCC | CAACCCTCACTTTCGCTCTC  |
| <i>gnb3</i>    | TGTCCTGTTGCCGTTTCATA  | ACTTGTGTGACCCTGGAAGG  |
| <i>rho</i>     | CGTGCACTTCTTCATCCCAC  | AGGAAGGCGATGACCATGAT  |

---
